# Supplementary material
Source: PubMed Central journal article supplement (PMC2669902)
Supplement: NIHMS86410-supplement-1_si_001.pdf [file NIHMS86410-supplement-1_si_001.pdf]

## Supporting Information

### **Anesthetic modulation of protein dynamics: insights from a NMR study**

Christian G. Canlas, Tanxing Cui, Ling Li, Yan Xu, Pei Tang\*

#### Table of Contents:

|                                              |       |
|----------------------------------------------|-------|
| I. Effect of detergent ratio on mistic       | S2    |
| II. Calculation of $K_d$                     | S2    |
| III. Mistic structure refinement using RDC   | S2-S3 |
| IV. $^{15}\text{N}$ $R_1$ , $R_2$ , NOE data | S3    |
| V. Residues having conformational exchange   | S4    |
| RDC data table                               | S5-S7 |
| Reference                                    | S7    |

I. The residues sensitive to changes of the micelle head-groups are likely located in micelle-water interface.

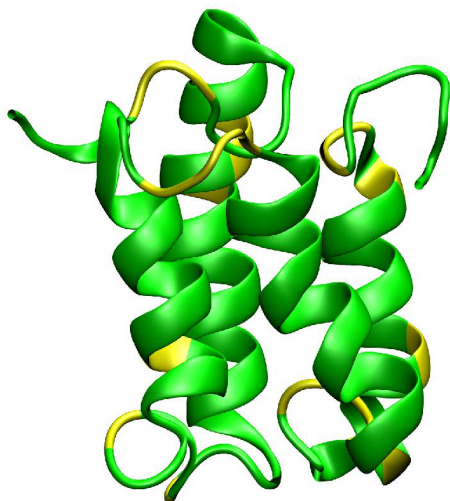

**Figure 1S.** The residues highlighted in yellow had large change in their chemical shift when the detergent composition was changed from 100% DPC to 40%LDAO/ 60%DPC, suggesting that these residues are located close to the micelle head-groups.

II. Estimation of halothane dissociation constants in Mystic based on changes of residues  $^1\text{H}$ - $^{15}\text{N}$  chemical shifts as a function of halothane concentrations.

The residue-specific dissociation constants,  $K_d$ , were obtained from the plot of (1):

$$\frac{1}{\Delta\delta} = \left( \frac{1}{\Delta\delta_{\max}} \right) + \left( \frac{K_d}{\Delta\delta_{\max}} \right) \frac{1}{[A_0]} \quad [\text{Eq. S1}]$$

Where  $\Delta\delta$  is the change of chemical shift in Hz,  $[A_0]$  is halothane concentration in mM, and  $\Delta\delta_{\max}$  is the maximum chemical shift difference between halothane in free and in hypothetically fully bound to Mystic.

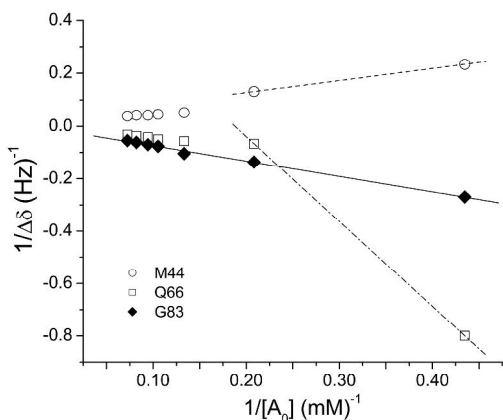

**Figure 2S.** The reciprocal chemical shift changes vs. the reciprocal halothane concentrations on three representative residues. The slope and intercept of each fitted line give an apparent dissociation constant,  $K_d$ , on the basis of **Eq. S1**.

Residues M44 and Q66 show greater or smaller slope at lower or higher halothane concentrations, respectively, indicating that these residues reside at the sites of Mystic where halothane has a limited access and interaction capacity. The derived  $K_d$  values for M44, Q66, and G83 are 5, 3, and 26 mM, correspondingly.

III. Structural Refinement using RDC

Figure 3S-A shows good correlations between the experimental RDC values and the back-calculated RDCs of refined structures of Mystic in DPC. Comparison of the refined structure in DPC with the published structure in LDAO constitutes an average backbone root

mean square deviation (RMSD) of 1.3 Angstrom, suggesting that Mystic folds similarly in LDAO and DPC.

A good correlation between the experimental RDCs and the back-calculated RDCs from refined Mystic structure in the presence of halothane is shown in Figure 3S-B. Mystic structures refined using RDC constraints in the absence and presence of halothane showed backbone RMSD of 0.6 Angstrom, suggesting minimal halothane effect on Mystic structures.

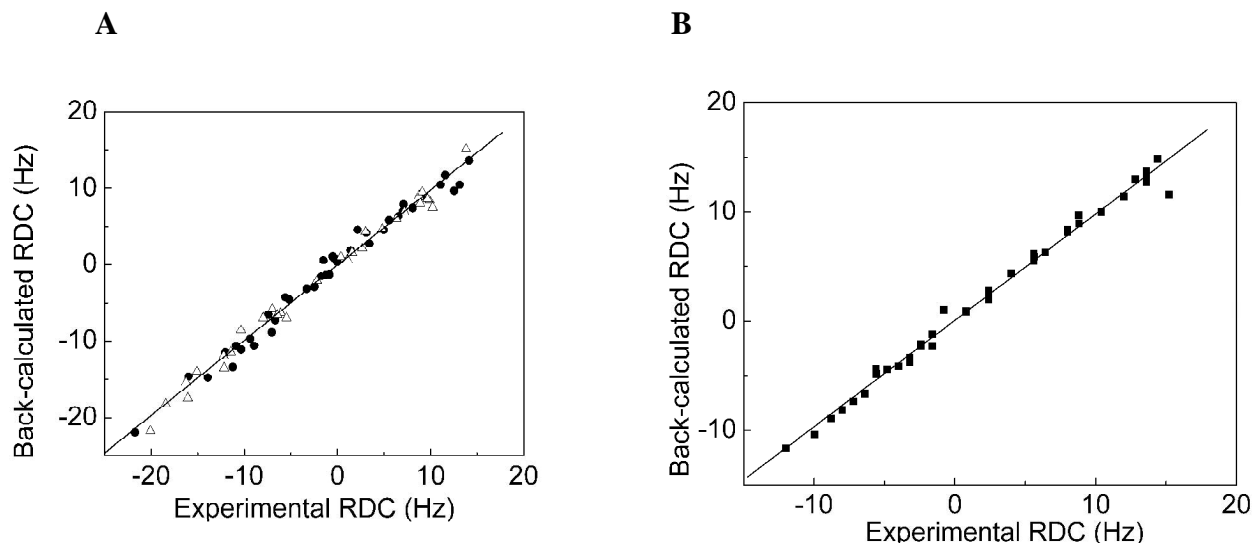

**Figure 3S.** Illustrates the fitting of experimental RDCs versus back-calculated RDCs from the refined Mystic structure. (A) Corresponds to the refinement of Mystic using compressed (●) and stretched (△) gel methods; (B) corresponds to the refinement of Mystic with 5mM halothane using compressed gel method.

#### IV. $^{15}\text{N}$ $R_1$ , $R_2$ , and NOE of Mystic in the absence and presence of 10 mM halothane

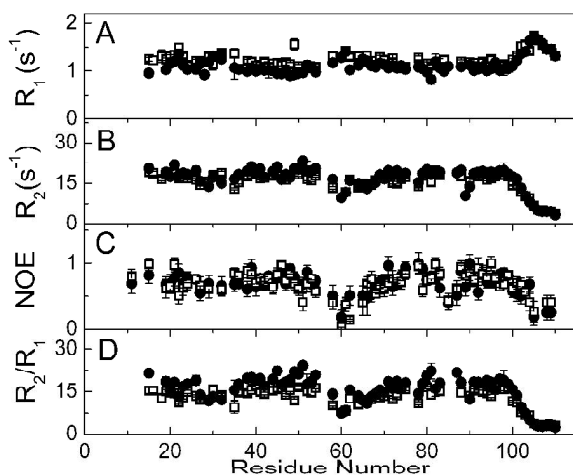

**Figure 4S.**  $^{15}\text{N}$  backbone dynamics of Mystic in the absence (□) and presence (●) of 10 mM halothane as measured by: (A) Longitudinal relaxation rate,  $R_1$ ; (B) Transverse relaxation rate,  $R_2$ ; (C)  $^{15}\text{N}$ - $^1\text{H}$  NOE; and (D)  $R_2/R_1$  ratio plotted against residue number. Slightly increase in  $R_2/R_1$  ratio suggested a small modification of global isotropic correlation time,  $\tau_m$ , from 12.1 ns to 13.5 ns.

## V. Residues involving in motion on the $\mu$ s-ms timescale

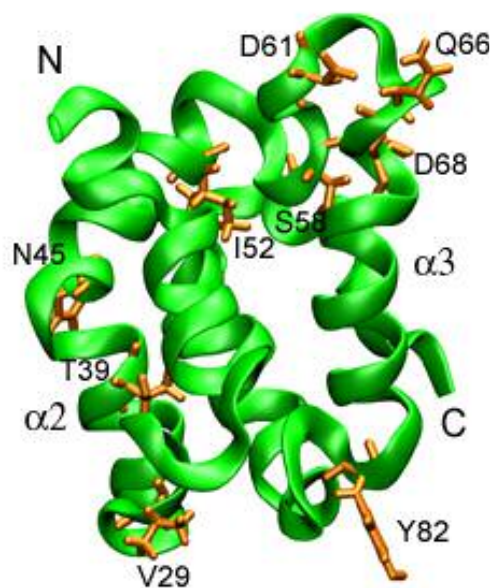

**Figure 5S.** Mystic residues involving in motion on the  $\mu$ s-ms timescale are labeled and highlighted in orange color. In the loop connecting  $\alpha 2$  and  $\alpha 3$ , residues D61 and Q66 are oriented upward, while residues S58 and D68 are oriented downward.

**Table 1S.** NH RDC data of Mystic aligned using compressed gel method at 800 MHz. Note that only residues in helical region are included.

| Num1 | Atom1 | Num2 | Atom2 | RDCexptal | RDCBack  | Diff.  |
|------|-------|------|-------|-----------|----------|--------|
| 15   | N     | 15   | HN    | -9.98000  |          |        |
| 18   | N     | 18   | HN    | -13.9200  | -14.7501 | 0.8301 |
| 19   | N     | 19   | HN    | -11.2400  | -13.3721 | 2.1321 |
| 20   | N     | 20   | HN    | -15.9900  | -14.6104 | 1.3796 |
| 21   | N     | 21   | HN    | -10.9000  | -10.5947 | 0.3053 |
| 35   | N     | 35   | HN    | -8.9400   | -10.5935 | 1.6535 |
| 36   | N     | 36   | HN    | -9.3600   | -9.6791  | 0.3191 |
| 38   | N     | 38   | HN    | -7.4100   | -6.5353  | 0.8747 |
| 39   | N     | 39   | HN    | -7.0500   | -8.8532  | 1.8032 |
| 40   | N     | 40   | HN    | 14.1300   | 13.6345  | 0.4955 |
| 41   | N     | 41   | HN    | -12.0400  | -11.4634 | 0.5766 |
| 45   | N     | 45   | HN    | 9.0000    | 8.9117   | 0.0883 |
| 46   | N     | 46   | HN    | 2.1600    | 4.5699   | 2.4099 |
| 47   | N     | 47   | HN    | 12.5400   | 9.6586   | 2.8814 |
| 48   | N     | 48   | HN    | -1.7500   | -1.5195  | 0.2305 |
| 49   | N     | 49   | HN    | 7.0900    | 7.8746   | 0.7846 |
| 51   | N     | 51   | HN    | -5.6100   | -4.2479  | 1.3621 |
| 52   | N     | 52   | HN    | -0.0200   | 0.3525   | 0.3725 |
| 54   | N     | 54   | HN    | 8.0900    | 7.4228   | 0.6672 |
| 68   | N     | 68   | HN    | -1.5000   | 0.5658   | 2.0658 |
| 69   | N     | 69   | HN    | 11.5800   | 11.7211  | 0.1411 |
| 70   | N     | 70   | HN    | -0.3200   | 0.8328   | 1.1528 |
| 71   | N     | 71   | HN    | 11.0600   | 10.4422  | 0.6178 |
| 72   | N     | 72   | HN    | 13.1300   | 10.4532  | 2.6768 |
| 73   | N     | 73   | HN    | -1.2700   | -1.3419  | 0.0719 |
| 75   | N     | 75   | HN    | 4.9800    | 4.5384   | 0.4416 |
| 80   | N     | 80   | HN    | 6.5400    | 6.3403   | 0.1997 |
| 81   | N     | 81   | HN    | -3.3000   | -3.1426  | 0.1574 |
| 87   | N     | 87   | HN    | 5.5400    | 5.7912   | 0.2512 |
| 88   | N     | 88   | HN    | 3.4300    | 2.7592   | 0.6708 |
| 90   | N     | 90   | HN    | 7.0000    | 6.9517   | 0.0483 |
| 92   | N     | 92   | HN    | -2.4600   | -2.8831  | 0.4231 |
| 93   | N     | 93   | HN    | -0.5100   | 1.0797   | 1.5897 |
| 94   | N     | 94   | HN    | -0.8600   | -1.2599  | 0.3999 |
| 95   | N     | 95   | HN    | -10.3300  | -11.0818 | 0.7518 |
| 96   | N     | 96   | HN    | -5.1800   | -4.5551  | 0.6249 |
| 97   | N     | 97   | HN    | 3.0900    | 4.1856   | 1.0956 |
| 98   | N     | 98   | HN    | -6.6900   | -7.2445  | 0.5545 |
| 100  | N     | 100  | HN    | 1.4200    | 1.8946   | 0.4746 |

**Table 2S.** NH RDC data of Mystic aligned using stretched charged gel method at 800 MHz. Note that only residues in helical region are included.

| Num1 | Atom1 | Num2 | Atom2 | RDCexptal | RDCBack  | Diff.  |
|------|-------|------|-------|-----------|----------|--------|
| 18   | N     | 18   | HN    | 6.3300    | 5.9529   | 0.3771 |
| 19   | N     | 19   | HN    | 2.6700    | 2.1168   | 0.5532 |
| 20   | N     | 20   | HN    | 13.8100   | 15.1401  | 1.3301 |
| 21   | N     | 21   | HN    | 8.7600    | 9.0253   | 0.2653 |
| 35   | N     | 35   | HN    | -11.4400  | -11.4265 | 0.0135 |
| 36   | N     | 36   | HN    | 1.0900    | 0.6687   | 0.4213 |
| 38   | N     | 38   | HN    | 9.1200    | 9.4888   | 0.3688 |
| 39   | N     | 39   | HN    | 7.1900    | 6.9373   | 0.2527 |
| 40   | N     | 40   | HN    | -7.0000   | -5.7890  | 1.2110 |
| 45   | N     | 45   | HN    | 9.9100    | 8.3776   | 1.5324 |
| 46   | N     | 46   | HN    | -10.3500  | -8.5434  | 1.8066 |
| 47   | N     | 47   | HN    | -12.2200  | -11.9024 | 0.3176 |
| 48   | N     | 48   | HN    | 4.8000    | 4.5459   | 0.2541 |
| 51   | N     | 51   | HN    | 4.8100    | 4.6259   | 0.1841 |
| 52   | N     | 52   | HN    | 1.5800    | 1.5658   | 0.0142 |
| 53   | N     | 53   | HN    | -16.2500  | -15.4064 | 0.8436 |
| 67   | N     | 67   | HN    | 8.8900    | 8.0114   | 0.8786 |
| 68   | N     | 68   | HN    | 3.0300    | 4.2929   | 1.2629 |
| 69   | N     | 69   | HN    | -15.0900  | -13.9689 | 1.1211 |
| 70   | N     | 70   | HN    | 0.3700    | 1.0171   | 0.6471 |
| 72   | N     | 72   | HN    | 10.2200   | 7.4917   | 2.7283 |
| 73   | N     | 73   | HN    | -16.0600  | -17.4570 | 1.3970 |
| 75   | N     | 75   | HN    | -20.0800  | -21.7369 | 1.6569 |
| 80   | N     | 80   | HN    | -6.0900   | -6.3148  | 0.2248 |
| 81   | N     | 81   | HN    | -12.1700  | -13.5094 | 1.3394 |
| 88   | N     | 88   | HN    | -5.4800   | -6.9908  | 1.5108 |
| 92   | N     | 92   | HN    | 9.6700    | 8.6117   | 1.0583 |
| 93   | N     | 93   | HN    | -7.9700   | -6.9781  | 0.9919 |
| 95   | N     | 95   | HN    | -6.4500   | -6.5795  | 0.1295 |
| 97   | N     | 97   | HN    | -18.4300  | -18.1890 | 0.2410 |
| 100  | N     | 100  | HN    | -2.2000   | -2.1091  | 0.0909 |

**Table 3S.** NH RDC data of Mystic with 5mM halothane aligned using compressed gel method at 800 MHz. Note that only residues in helical region are included.

| Num1 | Atom1 | Num2 | Atom2 | RDCexptal | RDCBack | Diff.  |
|------|-------|------|-------|-----------|---------|--------|
| 15   | N     | 15   | HN    | -9.9800   | -10.380 | 0.3958 |
| 16   | N     | 16   | HN    | -7.2100   | -7.3570 | 0.1473 |
| 20   | N     | 20   | HN    | -12.0100  | -11.620 | 0.3875 |
| 21   | N     | 21   | HN    | -8.8000   | -8.9250 | 0.1250 |
| 36   | N     | 36   | HN    | -6.4100   | -6.6710 | 0.2614 |
| 38   | N     | 38   | HN    | -3.2000   | -3.7940 | 0.5936 |
| 39   | N     | 39   | HN    | -4.0000   | -4.1310 | 0.1309 |
| 40   | N     | 40   | HN    | 5.6000    | 5.5490  | 0.0510 |
| 41   | N     | 41   | HN    | -8.0000   | -8.1420 | 0.1419 |
| 45   | N     | 45   | HN    | 5.6100    | 5.8730  | 0.2625 |
| 46   | N     | 46   | HN    | 8.8000    | 9.7120  | 0.9122 |
| 47   | N     | 47   | HN    | 13.6100   | 12.760  | 0.8507 |
| 48   | N     | 48   | HN    | 13.6000   | 13.760  | 0.1583 |
| 49   | N     | 49   | HN    | 4.0100    | 4.3660  | 0.3566 |
| 52   | N     | 52   | HN    | 13.6100   | 13.440  | 0.1735 |
| 53   | N     | 53   | HN    | -1.6000   | -2.2820 | 0.6819 |
| 54   | N     | 54   | HN    | 10.4000   | 10.020  | 0.3837 |
| 68   | N     | 68   | HN    | -5.5700   | -4.8520 | 0.7176 |
| 69   | N     | 69   | HN    | 14.4000   | 14.850  | 0.4454 |
| 70   | N     | 70   | HN    | 2.4000    | 2.7970  | 0.3972 |
| 71   | N     | 71   | HN    | 15.2000   | 11.590  | 3.6070 |
| 73   | N     | 73   | HN    | -1.6000   | -1.201  | 0.3990 |
| 75   | N     | 75   | HN    | 8.0100    | 8.3620  | 0.3524 |
| 80   | N     | 80   | HN    | 5.6000    | 6.1680  | 0.5678 |
| 81   | N     | 81   | HN    | 0.8000    | 0.9037  | 0.1037 |
| 87   | N     | 87   | HN    | 12.8100   | 12.980  | 0.1749 |
| 88   | N     | 88   | HN    | -2.4100   | -2.1470 | 0.2626 |
| 92   | N     | 92   | HN    | -3.2000   | -3.3510 | 0.1513 |
| 93   | N     | 93   | HN    | -0.8000   | 1.0440  | 1.8440 |
| 94   | N     | 94   | HN    | 2.4000    | 1.9470  | 0.4533 |
| 96   | N     | 96   | HN    | -4.8000   | -4.4160 | 0.3845 |
| 97   | N     | 97   | HN    | 8.0100    | 8.1460  | 0.1365 |
| 98   | N     | 98   | HN    | 12.0000   | 11.400  | 0.6005 |
| 100  | N     | 100  | HN    | 2.4000    | 2.3060  | 0.0941 |

## Reference

1. Foster, R., and C. A. Fyfe. 1969. Chapter 1 Nuclear magnetic resonance of organic charge-transfer complexes. *Progress in Nuclear Magnetic Resonance Spectroscopy* 4:1.
